# Supplementary material for: CO2 conversion to CO via plasma and electrolysis: a techno-economic and energy cost analysis
Source: Royal Society of Chemistry journal article supplement (doi:10.1039/d4ee00164h), 2024-01-01
Supplement: d4ee00164h1.pdf [file d4ee00164h1.pdf]

**Supplementary Material file for the article:**

**CO<sub>2</sub> conversion to CO via plasma and electrolysis: a techno-economic and energy cost analysis**

Jose Osorio-Tejada<sup>1,5</sup>, Marc Escriba-Gelonch<sup>2</sup>, Rani Vertongen<sup>3</sup>, Annemie Bogaerts<sup>3,\*</sup>, Volker Hessel<sup>1,4,\*</sup>

<sup>1</sup>School of Engineering, University of Warwick, United Kingdom

<sup>2</sup>Department of Environment, Soil Sciences and Chemistry, University of Lleida, Spain

<sup>3</sup>Research Group PLASMAN, Department of Chemistry, University of Antwerp, Belgium

<sup>4</sup>School of Chemical Engineering, University of Adelaide, Australia

<sup>5</sup>Faculty of Environmental Sciences, Universidad Tecnológica de Pereira, Colombia

\* Authors for correspondence: annemie.bogaerts@uantwerpen.be; volker.hessel@adelaide.edu.au

This Supplementary Material file presents the results of the techno-economic analyses for each CO production pathway in which capital and operating costs and the unitary cost of production (UCOP) are detailed. The methods, references, and assumptions for the calculation process are described in the main article.

**Contents**

**Table S1.** Capital costs for the plasma- and electrolysis-based plant (34,000 t CO/year)

**Table S2.** Operating costs for the plasma- and electrolysis-based plant (34,000 t CO/year)

**Table S3.** Total annual costs for the plasma- and electrolysis-based plants (34,000 t CO/year) by sections

**Table S4.** Unitary cost of production (UCOP) for the plasma- and electrolysis-based plants by sections

**Table S5.** Unitary cost of production (UCOP) for the plasma- and electrolysis-based plants by sections and scenarios

**Table S6.** Sensitivity analysis: Fig. 6(a) Electricity cost vs UCOP of CO

**Table S7.** Sensitivity analysis: Fig. 6(b) CO<sub>2</sub> conversion equipment cost vs UCOP of CO

**Table S8.** Sensitivity analysis: Fig. 7(a) Capacity factors vs UCOP of CO

**Table S9.** Sensitivity analysis: Fig. 7(b) CO<sub>2</sub> conversion equipment lifespan vs UCOP of CO

**Table S1***Capital costs for the plasma- and electrolysis-based plants (34,000 t CO/year)*

| CAPITAL COSTS                           | (US\$)              |                           | (%)                           |
|-----------------------------------------|---------------------|---------------------------|-------------------------------|
|                                         | <i>Plasma-based</i> | <i>Electrolysis-based</i> |                               |
| <b>Purchase Cost of Equipment (PCE)</b> | <b>34,035,612</b>   | <b>51,815,140</b>         |                               |
| CO <sub>2</sub> conversion equipment    | 22,261,965          | 37,914,156                |                               |
| Separation system equipment             | 11,773,648          | 13,900,985                |                               |
| <b>Direct costs</b>                     | <b>58,200,897</b>   | <b>88,603,890</b>         | Direct cost factors           |
| Purchase Cost of Equipment (PCE)        | 34,035,612          | 51,815,140                | 100% of PCE                   |
| Equipment installation                  | 8,508,903           | 12,953,785                | 25% of PCE                    |
| Instrumentation/controls installation   | 2,042,137           | 3,108,908                 | 6% of PCE                     |
| Piping installation                     | 3,403,561           | 5,181,514                 | 10% of PCE                    |
| Electrical systems installation         | 3,403,561           | 5,181,514                 | 10% of PCE                    |
| Buildings                               | 3,403,561           | 5,181,514                 | 10% of PCE                    |
| Site development                        | 3,403,561           | 5,181,514                 | 10% of PCE                    |
| <b>Indirect costs</b>                   | <b>10,969,678</b>   | <b>16,700,020</b>         | Indirect cost factors         |
| Engineering and supervision             | 2,910,045           | 4,430,194                 | 5% of direct costs            |
| Construction expenses                   | 3,492,054           | 5,316,233                 | 6% of direct costs            |
| Contractor fees                         | 1,164,018           | 1,772,078                 | 2% of direct costs            |
| Contingency fees                        | 3,403,561           | 5,181,514                 | 5% of FCI                     |
| <b>Fixed Capital Investment (FCI)</b>   | <b>69,170,575</b>   | <b>105,303,909</b>        | Direct costs + Indirect costs |

**Table S2***Operating costs for the plasma- and electrolysis-based plants (34,000 t CO/year)*

| OPERATING COSTS                            | Annual costs (US\$) |                           |                                     |
|--------------------------------------------|---------------------|---------------------------|-------------------------------------|
|                                            | <i>Plasma-based</i> | <i>Electrolysis-based</i> |                                     |
| <b>Total variable costs</b>                | <b>9,973,294</b>    | <b>11,997,826</b>         | Raw materials + Utilities           |
| <b>Raw materials</b>                       | <b>4,447,640</b>    | <b>2,445,708</b>          |                                     |
| CO <sub>2</sub> feed                       | 1,135,952           | 2,223,492                 |                                     |
| Solid carbon feed                          | 3,311,688           | 222,216                   |                                     |
| <b>Utilities</b>                           | <b>5,525,613</b>    | <b>9,552,118</b>          |                                     |
| Electricity for CO <sub>2</sub> conversion | 4,787,251           | 8,701,299                 |                                     |
| Electricity for separation section         | 738,363             | 850,820                   |                                     |
| <b>Total fixed costs</b>                   | <b>4,724,797</b>    | <b>8,349,387</b>          |                                     |
| Maintenance                                | 1,383,412           | 2,106,078                 | 2% of FCI                           |
| Electrolysis cells stack renovation        | 0                   | 1,926,323                 | 2.5% of the FCI (only electrolyser) |
| Operating labour                           | 812,000             | 812,000                   | Actuals (\$)                        |
| Laboratory charges                         | 81,200              | 81,200                    | 10% of operating labour             |
| Plan overheads and general expenses        | 1,479,797           | 1,949,531                 | 65% of labour and maintenance costs |
| Insurance                                  | 276,682             | 421,216                   | 0.4% of FCI                         |
| Taxes                                      | 691,706             | 1,053,039                 | 1% of FCI                           |
| <b>Total Operating costs</b>               | <b>14,698,018</b>   | <b>20,347,213</b>         | Variable costs + Fixed Costs        |

**Table S3***Total annual costs for the plasma- and electrolysis-based plants (34,000 t CO/year) by sections*

|                                 | Total Annual costs (US\$)  |                   |                   |                            |                   |                   |
|---------------------------------|----------------------------|-------------------|-------------------|----------------------------|-------------------|-------------------|
|                                 | Plasma-based               |                   |                   | Electrolysis-based         |                   |                   |
|                                 | CO <sub>2</sub> conversion | Separation        | TOTAL             | CO <sub>2</sub> conversion | Separation        | TOTAL             |
| <b>Annualised capital costs</b> | <b>5,314,225</b>           | <b>2,810,525</b>  | <b>8,124,750</b>  | <b>9,050,609</b>           | <b>3,318,348</b>  | <b>12,368,958</b> |
| <b>Capital costs</b>            | <b>45,242,991</b>          | <b>23,927,585</b> |                   | <b>77,052,938</b>          | <b>28,250,971</b> |                   |
| PCE                             | 22,261,965                 | 11,773,648        |                   | 37,914,156                 | 13,900,985        |                   |
| Installation                    | 22,981,026                 | 12,153,937        |                   | 39,138,783                 | 14,349,986        |                   |
| <b>Annual operating costs</b>   | <b>12,325,246</b>          | <b>2,372,771</b>  | <b>14,698,018</b> | <b>17,773,212</b>          | <b>2,574,001</b>  | <b>20,347,213</b> |
| CO <sub>2</sub> feed            | 1,135,943                  |                   |                   | 2,223,492                  |                   |                   |
| Solid carbon feed               | 3,311,664                  |                   |                   | 0                          |                   |                   |
| Deionised water                 | 0                          |                   |                   | 222,216                    |                   |                   |
| Electricity                     | 4,787,251                  | 738,363           |                   | 8,701,299                  | 850,820           |                   |
| Fixed Opex                      | 3,090,388                  | 1,634,409         |                   | 6,626,205                  | 1,723,182         |                   |
| <b>TOTAL</b>                    | <b>17,639,471</b>          | <b>5,183,296</b>  | <b>22,822,767</b> | <b>26,823,821</b>          | <b>5,892,350</b>  | <b>32,716,171</b> |

**Table S4***Unitary cost of production (UCOP) for the plasma- and electrolysis-based plants by sections*

| Section                    | Cost type | UCOP (US\$/t CO) |                    |
|----------------------------|-----------|------------------|--------------------|
|                            |           | Plasma-based     | Electrolysis-based |
| CO <sub>2</sub> conversion | Capex     | 156              | 266                |
|                            | Opex      | 363              | 523                |
| Separation section         | Capex     | 83               | 98                 |
|                            | Opex      | 70               | 76                 |
| <b>TOTAL</b>               |           | <b>671</b>       | <b>962</b>         |

**Table S5**

*Unitary cost of production (UCOP) for the plasma- and electrolysis-based plants by sections and scenarios*

This table contains the underlying data for Figures 4 (base case) and 5 (scenarios) in the main paper.

| SCENARIO                   |                      | Base case        |            | (1) Equipment cost |            |              |            | (2) Electricity cost |            |              |            | (3) CO <sub>2</sub> feed cost |            |            |            | (4) All feedstock costs |            |              |            | (5) Conversion energy cost |            |            |            | (6) SPC      |            |            |       |
|----------------------------|----------------------|------------------|------------|--------------------|------------|--------------|------------|----------------------|------------|--------------|------------|-------------------------------|------------|------------|------------|-------------------------|------------|--------------|------------|----------------------------|------------|------------|------------|--------------|------------|------------|-------|
| Sub-scenario               |                      |                  |            | - 50%              |            | +50%         |            | - 50%                |            | +50%         |            | - 50%                         |            | +50%       |            | - 50%                   |            | +50%         |            | - 50%                      |            | +50%       |            | - 50%        |            | +50%       |       |
| Technology                 | Plasm.               | Electr.          | Plasm.     | Electr.            | Plasm.     | Electr.      | Plasm.     | Electr.              | Plasm.     | Electr.      | Plasm.     | Electr.                       | Plasm.     | Electr.    | Plasm.     | Electr.                 | Plasm.     | Electr.      | Plasm.     | Electr.                    | Plasm.     | Electr.    | Plasm.     | Electr.      | Plasm.     | Electr.    |       |
| Section                    | Item                 | UCOP (US\$/t CO) |            |                    |            |              |            |                      |            |              |            |                               |            |            |            |                         |            |              |            |                            |            |            |            |              |            |            |       |
| CO <sub>2</sub> conversion | CAPEX                | 156.3            | 266.2      | 78.1               | 133.1      | 234.3        | 399.3      | 156.2                | 266.2      | 156.2        | 266.2      | 156.2                         | 266.2      | 156.2      | 266.2      | 156.2                   | 266.2      | 156.2        | 266.2      | 156.2                      | 266.2      | 156.2      | 266.2      | 156.2        | 266.2      | 156.2      | 266.2 |
|                            | CO <sub>2</sub> feed | 33.4             | 65.4       | 33.4               | 65.4       | 33.4         | 65.4       | 33.4                 | 65.4       | 33.4         | 65.4       | 16.7                          | 32.7       | 50.1       | 98.1       | 16.7                    | 32.7       | 50.1         | 98.1       | 33.4                       | 65.4       | 33.4       | 65.4       | 35.4         | 67.9       | 32.7       | 64.6  |
|                            | Electricity          | 140.8            | 255.9      | 140.8              | 255.9      | 140.8        | 255.9      | 70.4                 | 128.0      | 211.2        | 383.9      | 140.8                         | 255.9      | 140.8      | 255.9      | 70.4                    | 128.0      | 211.2        | 383.9      | 70.4                       | 128.0      | 211.2      | 383.9      | 187.7        | 255.9      | 187.7      | 255.9 |
|                            | Water                | 0.0              | 6.5        | 0.0                | 6.5        | 0.0          | 6.5        | 0.0                  | 6.5        | 0.0          | 6.5        | 0.0                           | 6.5        | 0.0        | 6.5        | 0.0                     | 3.3        | 0.0          | 9.8        | 0.0                        | 6.5        | 0.0        | 6.5        | 0.0          | 6.5        | 0.0        | 6.5   |
|                            | Solid carbon         | 97.4             | 0.0        | 97.4               | 0.0        | 97.4         | 0.0        | 97.4                 | 0.0        | 97.4         | 0.0        | 97.4                          | 0.0        | 97.4       | 0.0        | 48.7                    | 0.0        | 146.1        | 0.0        | 97.4                       | 0.0        | 97.4       | 0.0        | 97.4         | 0.0        | 97.4       | 0.0   |
|                            | Fixed Opex           | 90.9             | 194.9      | 52.3               | 106.6      | 125.8        | 279.6      | 90.8                 | 194.9      | 90.8         | 194.9      | 90.8                          | 194.9      | 90.8       | 194.9      | 90.8                    | 194.9      | 90.8         | 194.9      | 52.3                       | 363.0      | 125.8      | 136.7      | 110.1        | 190.7      | 116.5      | 196.9 |
| Separation                 | CAPEX                | 82.7             | 97.6       | 82.7               | 97.6       | 82.7         | 97.6       | 82.7                 | 97.6       | 82.7         | 97.6       | 82.7                          | 97.6       | 82.7       | 97.6       | 82.7                    | 97.6       | 82.7         | 97.6       | 82.7                       | 97.6       | 82.7       | 97.6       | 129.4        | 152.8      | 64.0       | 75.6  |
|                            | Electricity          | 21.7             | 25.0       | 21.7               | 25.0       | 21.7         | 25.0       | 10.9                 | 12.5       | 32.6         | 37.5       | 21.7                          | 25.0       | 21.7       | 25.0       | 10.9                    | 12.5       | 32.6         | 37.5       | 21.7                       | 25.0       | 21.7       | 25.0       | 40.3         | 48.8       | 15.5       | 17.1  |
|                            | Fixed Opex           | 48.1             | 50.7       | 55.4               | 57.4       | 44.4         | 47.6       | 48.1                 | 50.7       | 48.1         | 50.7       | 48.1                          | 50.7       | 48.1       | 50.7       | 48.1                    | 50.7       | 48.1         | 50.7       | 55.4                       | 45.8       | 44.4       | 54.4       | 68.4         | 76.9       | 35.8       | 39.8  |
| Δ%                         | -                    | -                | -16%       | -22%               | 16%        | 22%          | -12%       | -15%                 | 12%        | 15%          | -3%        | -3%                           | 2%         | 3%         | -22%       | -18%                    | 22%        | 18%          | -27%       | 31%                        | 27%        | -2%        | 31%        | 11%          | 13%        | -4%        |       |
| <b>TOTAL UCOP</b>          | <b>671</b>           | <b>962</b>       | <b>562</b> | <b>748</b>         | <b>780</b> | <b>1,177</b> | <b>590</b> | <b>822</b>           | <b>752</b> | <b>1,103</b> | <b>654</b> | <b>930</b>                    | <b>688</b> | <b>995</b> | <b>524</b> | <b>786</b>              | <b>818</b> | <b>1,139</b> | <b>491</b> | <b>1,264</b>               | <b>851</b> | <b>947</b> | <b>877</b> | <b>1,066</b> | <b>758</b> | <b>923</b> |       |

**Table S6***Sensitivity analysis: Fig. 6(a) Electricity cost vs UCOP of CO*

| $\Delta\%$ | Electricity cost<br>(\$/kWh) | UCOP (US\$/t CO)    |                           |
|------------|------------------------------|---------------------|---------------------------|
|            |                              | <i>Plasma-based</i> | <i>Electrolysis-based</i> |
| -83        | 0.005                        | 536                 | 728                       |
| -67        | 0.010                        | 563                 | 775                       |
| -50        | 0.015                        | 590                 | 822                       |
| -33        | 0.020                        | 617                 | 869                       |
| -17        | 0.025                        | 644                 | 915                       |
| 0          | 0.030                        | 671                 | 962                       |
| 17         | 0.035                        | 698                 | 1,009                     |
| 33         | 0.040                        | 725                 | 1,056                     |
| 50         | 0.045                        | 752                 | 1,103                     |
| 67         | 0.050                        | 779                 | 1,150                     |
| 83         | 0.055                        | 807                 | 1,196                     |
| 100        | 0.060                        | 834                 | 1,243                     |

**Table S7***Sensitivity analysis: Fig. 6(b) CO<sub>2</sub> conversion equipment cost vs UCOP of CO*

| $\Delta\%$ | Plasma system<br>(US\$/kW) | Electrolyser system<br>(US\$/m <sup>2</sup> ) | UCOP (US\$/t CO)    |                           |
|------------|----------------------------|-----------------------------------------------|---------------------|---------------------------|
|            |                            |                                               | <i>Plasma-based</i> | <i>Electrolysis-based</i> |
| -91        | 124                        | 874                                           | 471                 | 570                       |
| -80        | 284                        | 2,000                                         | 496                 | 619                       |
| -70        | 427                        | 3,000                                         | 518                 | 662                       |
| -60        | 569                        | 4,000                                         | 540                 | 705                       |
| -50        | 711                        | 5,000                                         | 562                 | 748                       |
| -40        | 853                        | 6,000                                         | 584                 | 790                       |
| -30        | 995                        | 7,000                                         | 605                 | 833                       |
| -20        | 1,138                      | 8,000                                         | 627                 | 876                       |
| -10        | 1,280                      | 9,000                                         | 649                 | 919                       |
| 0          | 1,422                      | 10,000                                        | 671                 | 962                       |
| 10         | 1,564                      | 11,000                                        | 693                 | 1,005                     |
| 20         | 1,706                      | 12,000                                        | 715                 | 1,048                     |
| 30         | 1,849                      | 13,000                                        | 737                 | 1,091                     |
| 40         | 1,991                      | 14,000                                        | 759                 | 1,134                     |
| 50         | 2,133                      | 15,000                                        | 780                 | 1,177                     |
| 60         | 2,275                      | 16,000                                        | 802                 | 1,220                     |
| 70         | 2,417                      | 17,000                                        | 824                 | 1,263                     |
| 80         | 2,560                      | 18,000                                        | 846                 | 1,306                     |
| 90         | 2,702                      | 19,000                                        | 868                 | 1,349                     |
| 100        | 2,844                      | 20,000                                        | 890                 | 1,392                     |

**Table S8**

Sensitivity analysis: Fig. 7(a) Capacity factors vs UCOP of CO

| $\Delta\%$ | Production<br>(t CO/y) | Capacity factor | UCOP (US\$/t CO)    |                           | Opex ratio (%)      |                           |
|------------|------------------------|-----------------|---------------------|---------------------------|---------------------|---------------------------|
|            |                        |                 | <i>Plasma-based</i> | <i>Electrolysis-based</i> | <i>Plasma-based</i> | <i>Electrolysis-based</i> |
| -89        | 3,650                  | 0.10            | 3,651               | 5,868                     | 39                  | 42                        |
| -78        | 7,300                  | 0.20            | 1,992               | 3,130                     | 44                  | 46                        |
| -68        | 10,950                 | 0.30            | 1,439               | 2,218                     | 48                  | 49                        |
| -57        | 14,600                 | 0.40            | 1,153               | 1,752                     | 52                  | 52                        |
| -46        | 18,250                 | 0.50            | 989                 | 1,480                     | 55                  | 54                        |
| -35        | 21,900                 | 0.60            | 873                 | 1,292                     | 58                  | 56                        |
| -25        | 25,550                 | 0.70            | 796                 | 1,164                     | 60                  | 58                        |
| -14        | 29,200                 | 0.80            | 733                 | 1,062                     | 62                  | 60                        |
| 0          | 34,000                 | 0.93            | 671                 | 962                       | 64                  | 62                        |

**Table S9**Sensitivity analysis: Fig. 7(b) CO<sub>2</sub> conversion equipment lifespan vs UCOP of CO

| $\Delta\%$ | Lifespan<br>(years) | UCOP (US\$/t CO)    |                           | Opex ratio (%)      |                           |
|------------|---------------------|---------------------|---------------------------|---------------------|---------------------------|
|            |                     | <i>Plasma-based</i> | <i>Electrolysis-based</i> | <i>Plasma-based</i> | <i>Electrolysis-based</i> |
| -90        | 2                   | 1,281               | 2,002                     | 34                  | 30                        |
| -80        | 4                   | 934                 | 1,411                     | 46                  | 42                        |
| -70        | 6                   | 820                 | 1,216                     | 53                  | 49                        |
| -60        | 8                   | 764                 | 1,121                     | 57                  | 53                        |
| -50        | 10                  | 731                 | 1,065                     | 59                  | 56                        |
| -40        | 12                  | 710                 | 1,029                     | 61                  | 58                        |
| -30        | 14                  | 695                 | 1,004                     | 62                  | 60                        |
| -20        | 16                  | 685                 | 986                       | 63                  | 61                        |
| -10        | 18                  | 677                 | 972                       | 64                  | 62                        |
| 0          | 20                  | 671                 | 962                       | 64                  | 62                        |
